# Supplementary material
Source: PubMed Central journal article supplement (PMC4846350)
Supplement: NIHMS4537-supplement-1.pdf [file NIHMS4537-supplement-1.pdf]

## Supplementary Information

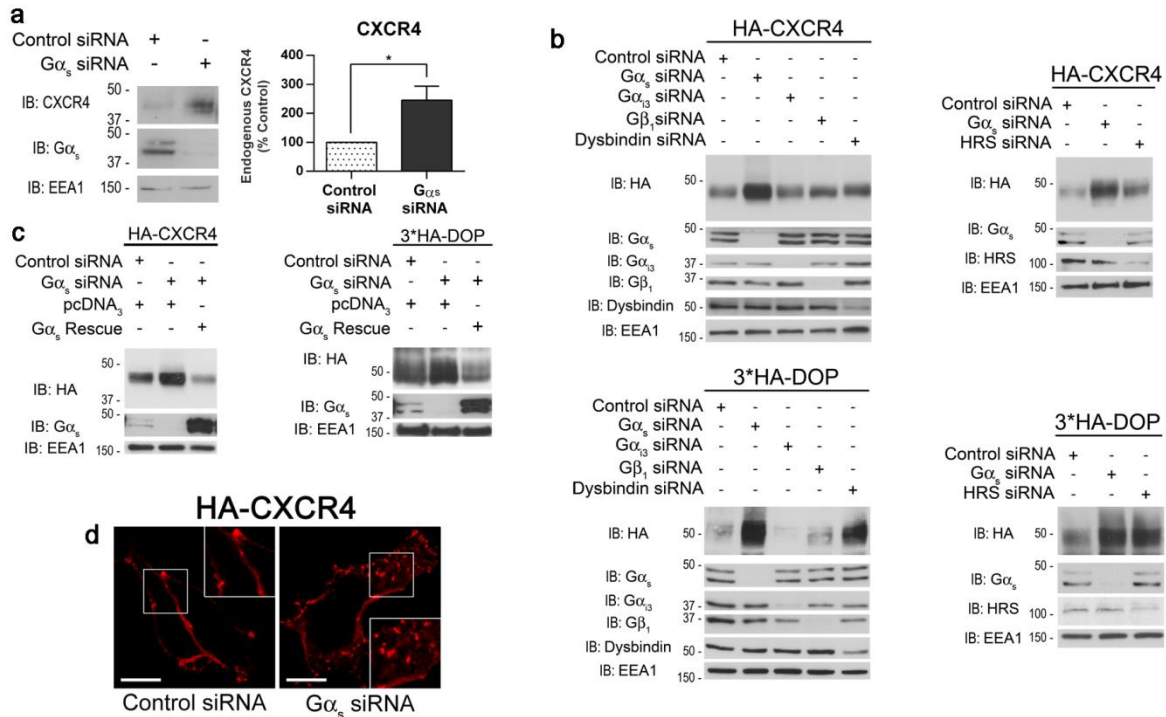

**Supplementary Figure 1. Specificity of the effect of G $\alpha_s$  knockdown on the basal levels of CXCR4 and DOP.** (a) HeLa cells endogenously expressing CXCR4 receptor were transfected with control or G $\alpha_s$  siRNA for 72 h. Steady-state levels of these tagged-GPCRs were analyzed by immunoblotting using anti-CXCR4 antibody. EEA1, loading controls. The histogram depicts the quantification of CXCR4 endogenous level of expression presented as percentage of levels quantified in control cells. Values shown are means  $\pm$  SEM of  $\geq 3$  separate experiments. \*  $p < 0.05$ . (b) Effect of depletion of other heterotrimeric G proteins and components of the endosomal sorting machinery on the basal levels of HA-CXCR4 and Flag-DOP. HEK293 cells were transfected with control, G $\alpha_s$ , G $\alpha_{13}$ , G $\beta_1$ , dysbindin or HRS siRNA. Twenty-four hours later, cells were transfected with HA-CXCR4 and HA-DOP and incubated for another 48 hours. Cells were lysed and analyzed by immunoblotting (IB) using the indicated antibody. EEA1 was used as a loading controls. (c) Expression of G $\alpha_s$  rescues the basal levels of HA-CXCR4 and HA-DOP. Control or G $\alpha_s$  siRNA-treated HEK293 cells expressing HA-CXCR4 or HA-DOP were transfected with pcDNA3 (control vector) or siRNA-resistant versions of the short and long forms of G $\alpha_s$  (G $\alpha_s$  Rescue) 10 h after the initial human G $\alpha_s$  siRNA transfection. Cells were lysed and analyzed by immunoblotting (IB) using the indicated antibody. EEA1 was used as loading controls. (d) Immunofluorescence analysis of the steady state distribution of HA-CXCR4 in control or G $\alpha_s$  siRNA-treated HEK293 cells. Cells were fixed, permeabilized, immunostained with anti-HA antibodies and processed for confocal microscopy analysis. In controls cells, HA-CXCR4 localized at cell surface whereas in G $\alpha_s$  siRNA treated cells, GPCR localized at cell surface and in intracellular compartments. Scale bars, 10  $\mu$ m.

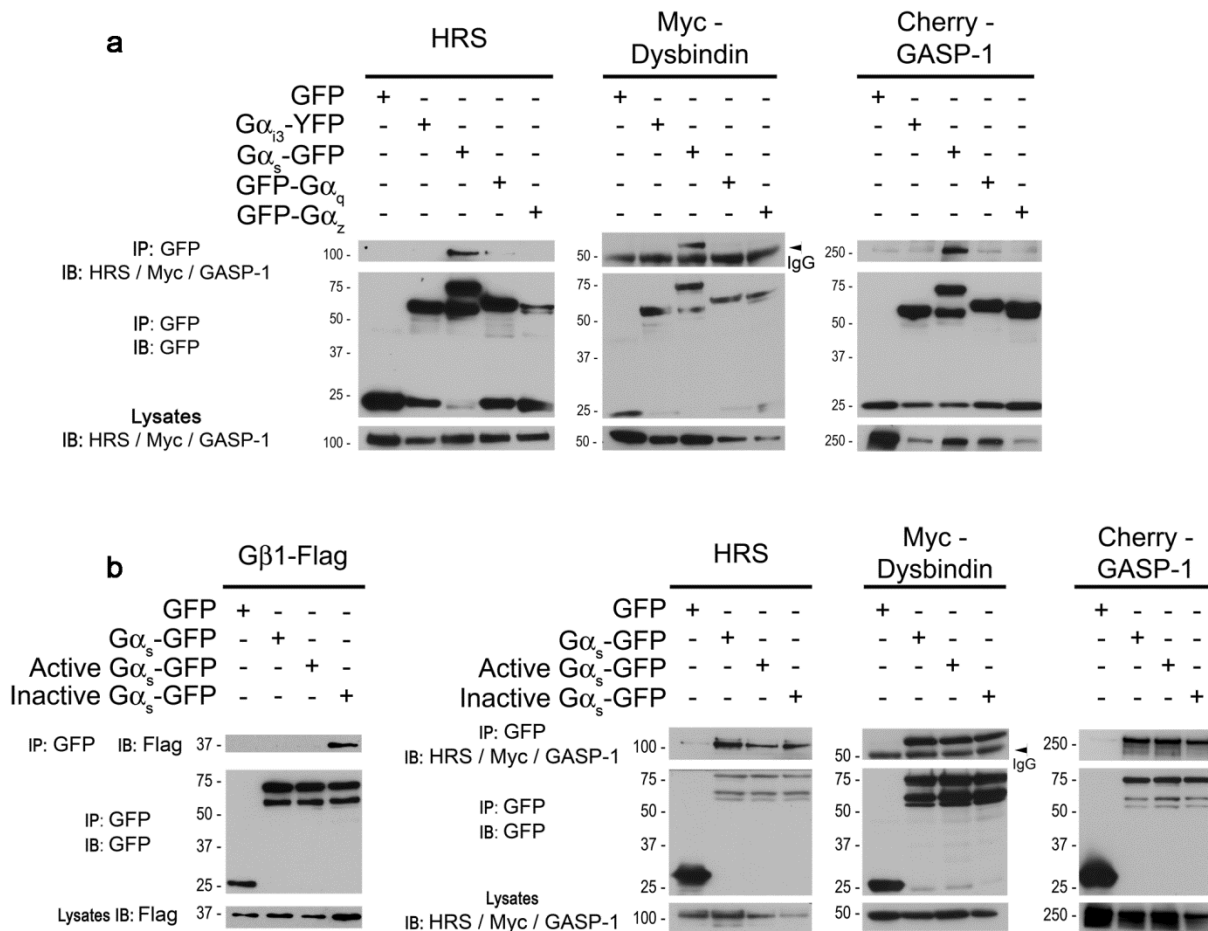

**Supplementary Figure 2. Dysbindin and GASP-1 interact specifically with G $\alpha_s$ -GFP independently of its activity state.** (a) Dysbindin and GASP-1 do not interact with other G $\alpha$  proteins. Lysate from HEK293 cells transiently transfected with GFP, G $\alpha_s$ -GFP, G $\alpha_{13}$ -GFP, G $\alpha_q$ -GFP or G $\alpha_z$ -GFP together with HRS, Myc-dysbindin or Cherry-GASP1 were immunoprecipitated (IP) with anti-GFP and immunoblotted (IB) using the indicated antibody. Only G $\alpha_s$ -GFP coimmunoprecipitated with all these proteins. (b) Constitutively active and inactive forms of G $\alpha_s$  similarly co-immunoprecipitated with dysbindin, HRS and GASP-1. HEK293 cells were transiently transfected with GFP, wild-type G $\alpha_s$ -GFP, constitutively active G $\alpha_s$ -GFP (Q227L) or inactive G $\alpha_s$ -GFP (G226A; R280T; T284D; I285T and A366S) together with HRS, Myc-dysbindin or Cherry-GASP1. Cells were lysed, immunoprecipitated (IP) with anti-GFP and immunoblotted (IB) using the indicated antibody. Coimmunoprecipitation of endogenous G $\beta$ 1 was used as a control to confirm the activation status of G $\alpha_s$  mutants since G $\beta$ 1 only binds inactive G $\alpha_s$ .

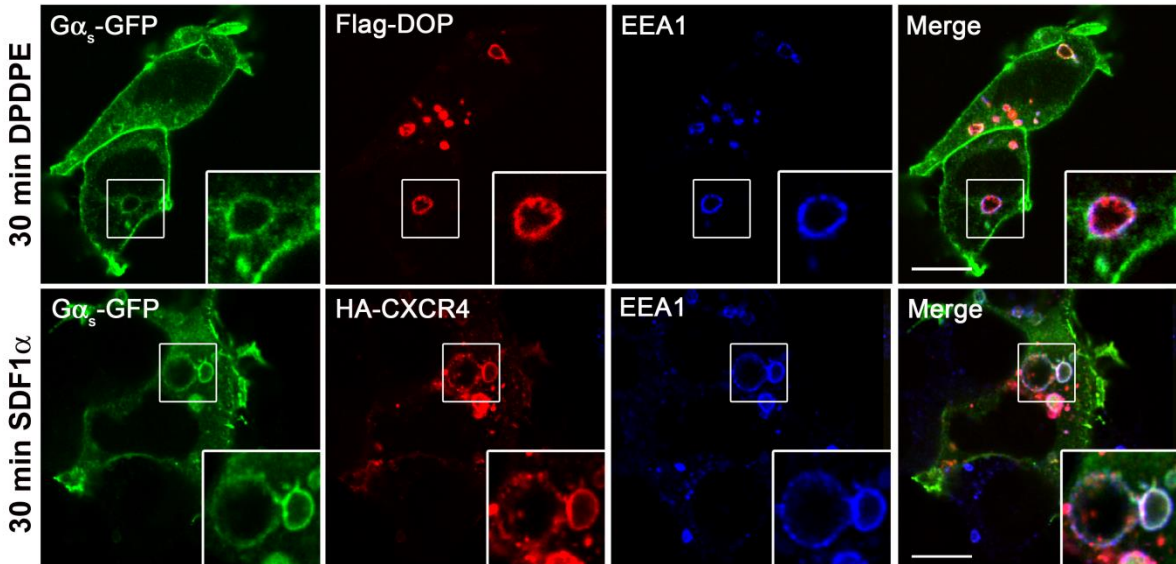

**Supplementary Figure 3.  $G\alpha_s$  colocalized with internalized GPCR on early endosomes.  $G\alpha_s$ -GFP and FLAG-DOP or HA-CXCR4 are together on early endosomes.** HEK293 cells stably expressing Flag-DOP or transiently expressing HA-CXCR4 were transfected with  $G\alpha_s$ -GFP and Rab5Q79L, which created enlarged early endosomes. Cell-surface Flag-DOP or HA-CXCR4 was labeled with anti-Flag or HA at 4°C before incubation at 37°C in the presence of agonist for 30 min. Cells were fixed, permeabilized, stained with anti-GFP and anti-EEA1 (endogenous marker of early endosomes) and examined by confocal microscopy. The merged image indicates colocalization between  $G\alpha_s$  and internalized Flag-DOP or HA-CXCR4 on EEA1-labeled enlarged endosomes. Scale bars, 10  $\mu$ m.
